# Supplementary material for: Children of more empowered women are less likely to be left without vaccination in low- and middle-income countries: A global analysis of 50 DHS surveys
Source: PubMed Central journal article supplement (PMC8943525; doi:10.7189/jogh.12.04022), 2022-03-26
Supplement: jogh-12-04022-s001.pdf [file jogh-12-04022-s001.pdf]

## Supplementary material

Table S1 – Countries and estimates

| Country     | ISO | No-DPT prevalence (CI 95%) | SWPER domain              | No-DPT prevalence (CI 95%) |                  |                  | SII   | P value | CIX   | P value |
|-------------|-----|----------------------------|---------------------------|----------------------------|------------------|------------------|-------|---------|-------|---------|
|             |     |                            |                           | Low                        | Medium           | High             |       |         |       |         |
| Afghanistan | AFG | 27.1 (23.8,30.7)           | Social independence       | 29.4 (25.4,33.7)           | 27.7 (23.3,32.7) | 16.7 (11.9,22.9) | -12.2 | 0.012   | -2.1  | 0.496   |
|             |     |                            | Decision making           | 36.2 (30.3,42.6)           | 22.5 (18.1,27.7) | 21.0 (18.2,24.1) | -23.2 | 0.000   | -10.3 | 0.000   |
|             |     |                            | Attitude towards violence | 28.7 (24.5,33.2)           | 26.8 (22.4,31.7) | 21.7 (18.0,25.9) | -7.9  | 0.038   | -0.6  | 0.761   |
| Angola      | AGO | 31.8 (28.6,35.2)           | Social independence       | 38.6 (33.9,43.6)           | 34.1 (28.9,39.7) | 14.8 (10.8,20.0) | -29.3 | 0.000   | -12.4 | 0.000   |
|             |     |                            | Decision making           | 46.0 (35.0,57.4)           | 32.2 (27.3,37.5) | 30.1 (26.1,34.5) | -11.0 | 0.066   | -2.8  | 0.368   |
|             |     |                            | Attitude towards violence | 40.9 (32.5,49.9)           | 39.8 (32.7,47.4) | 28.2 (24.8,31.9) | -21.9 | 0.000   | -6.0  | 0.046   |
| Armenia     | ARM | 1.6 (0.7,3.4)              | Social independence       | 0.0                        | 0.8 (0.1,5.3)    | 1.8 (0.8,4.1)    | 2.2   | 0.332   | 28.9  | 0.046   |
|             |     |                            | Decision making           | 0.0                        | 3.7 (1.4,9.7)    | 0.7 (0.2,2.3)    | -4.1  | 0.134   | -14.5 | 0.559   |
|             |     |                            | Attitude towards violence | 3.2 (0.4,20.7)             | 0.0              | 1.6 (0.7,3.7)    | -0.1  | 0.975   | 21.9  | 0.273   |
| Bangladesh  | BGD | 1.5 (0.9,2.5)              | Social independence       | 2.0 (1.2,3.5)              | 1.1 (0.4,2.5)    | 0.9 (0.3,2.7)    | -1.9  | 0.085   | -18.2 | 0.114   |
|             |     |                            | Decision making           | 1.6 (0.5,5.6)              | 2.3 (1.2,4.4)    | 0.9 (0.5,1.8)    | -1.8  | 0.209   | -18.0 | 0.146   |
|             |     |                            | Attitude towards violence | 0.0                        | 2.4 (0.9,6.0)    | 1.4 (0.8,2.2)    | -0.9  | 0.515   | -8.4  | 0.427   |
| Benin       | BEN | 16.7 (14.7,19.0)           | Social independence       | 19.8 (16.7,23.5)           | 15.2 (12.5,18.3) | 12.0 (8.9,15.9)  | -11.5 | 0.002   | -14.2 | 0.000   |
|             |     |                            | Decision making           | 24.0 (20.1,28.4)           | 16.4 (13.6,19.6) | 9.9 (7.5,12.9)   | -20.1 | 0.000   | -22.5 | 0.000   |
|             | BFA | 5.6 (4.5,7.1)              | Attitude towards violence | 20.5 (16.4,25.3)           | 15.7 (11.6,20.8) | 15.8 (13.5,18.3) | -6.2  | 0.086   | -9.3  | 0.006   |
|             |     |                            | Social independence       | 6.7 (5.2,8.6)              | 4.5 (2.7,7.3)    | 1.3 (0.4,3.9)    | -6.8  | 0.008   | -11.0 | 0.032   |

|               |     |                  |  |                           |                  |                  |                  |       |       |       |       |
|---------------|-----|------------------|--|---------------------------|------------------|------------------|------------------|-------|-------|-------|-------|
| Burkina Faso  |     |                  |  | Decision making           | 3.5 (2.4,5.2)    | 7.9 (5.9,10.3)   | 4.9 (2.7,8.9)    | 5.3   | 0.009 | 14.9  | 0.005 |
|               |     |                  |  | Attitude towards violence | 5.4 (3.6,8.2)    | 5.0 (3.0,8.1)    | 6.0 (4.5,8.0)    | 1.2   | 0.559 | 3.8   | 0.544 |
|               |     |                  |  | Social independence       | 1.0 (0.4,2.4)    | 0.4 (0.1,1.1)    | 0.3 (0.1,1.1)    | -0.9  | 0.154 | -34.6 | 0.016 |
| Burundi       | BDI | 0.5 (0.3,0.9)    |  | Decision making           | 0.0              | 0.7 (0.3,1.8)    | 0.6 (0.3,1.2)    | 0.4   | 0.471 | -3.8  | 0.781 |
|               |     |                  |  | Attitude towards violence | 0.5 (0.2,1.5)    | 0.3 (0.1,1.1)    | 0.7 (0.3,1.6)    | 0.3   | 0.609 | 0.8   | 0.960 |
|               |     |                  |  | Social independence       | 13.7 (8.5,21.3)  | 6.2 (4.0,9.5)    | 3.5 (1.9,6.3)    | -11.3 | 0.003 | -31.9 | 0.000 |
| Cambodia      | KHM | 6.0 (4.5,7.9)    |  | Decision making           | 0.8 (0.1,6.2)    | 2.7 (1.2,6.4)    | 6.6 (4.9,8.9)    | 8.5   | 0.032 | -1.4  | 0.864 |
|               |     |                  |  | Attitude towards violence | 8.2 (5.1,13.1)   | 5.3 (3.2,8.8)    | 5.2 (3.2,8.3)    | -3.9  | 0.189 | -15.3 | 0.053 |
|               |     |                  |  | Social independence       | 22.9 (18.3,28.4) | 14.8 (11.3,19.0) | 10.1 (6.7,14.9)  | -20.0 | 0.000 | -15.6 | 0.000 |
| Cameroon      | CMR | 17.1 (14.3,20.3) |  | Decision making           | 24.0 (18.7,30.4) | 12.2 (8.4,17.4)  | 13.6 (10.6,17.2) | -16.4 | 0.003 | -13.0 | 0.005 |
|               |     |                  |  | Attitude towards violence | 23.1 (16.3,31.6) | 15.3 (10.6,21.5) | 16.1 (13.1,19.7) | -7.2  | 0.148 | -2.1  | 0.624 |
|               |     |                  |  | Social independence       | 45.4 (42.0,48.9) | 38.4 (33.5,43.5) | 34.3 (23.8,46.6) | -16.4 | 0.004 | -2.3  | 0.225 |
| Chad          | TCD | 43.3 (40.1,46.4) |  | Decision making           | 48.8 (44.2,53.5) | 40.1 (35.9,44.5) | 38.1 (32.5,44.0) | -16.5 | 0.001 | -4.3  | 0.032 |
|               |     |                  |  | Attitude towards violence | 41.6 (37.8,45.4) | 42.3 (36.5,48.4) | 49.3 (43.2,55.4) | 10.0  | 0.067 | 4.7   | 0.028 |
|               |     |                  |  | Social independence       | 20.1 (14.1,27.7) | 21.5 (14.5,30.8) | 10.2 (6.3,16.1)  | -13.7 | 0.028 | -18.1 | 0.004 |
| Comoros       | COM | 17.3 (13.5,22.0) |  | Decision making           | 22.4 (16.0,30.4) | 12.6 (6.9,21.8)  | 16.3 (10.3,25.0) | -10.1 | 0.191 | -12.9 | 0.067 |
|               |     |                  |  | Attitude towards violence | 25.1 (16.9,35.6) | 19.4 (11.7,30.4) | 13.4 (9.2,19.3)  | -17.0 | 0.038 | -17.2 | 0.035 |
|               |     |                  |  | Social independence       | 23.9 (20.5,27.6) | 16.9 (13.4,21.0) | 10.9 (7.4,15.9)  | -18.3 | 0.000 | -11.4 | 0.002 |
| Congo, DR     | COD | 18.6 (16.3,21.2) |  | Decision making           | 23.6 (19.3,28.4) | 18.0 (14.7,21.8) | 15.0 (12.3,18.3) | -11.8 | 0.001 | -7.2  | 0.022 |
|               |     |                  |  | Attitude towards violence | 21.2 (17.7,25.3) | 16.5 (12.9,21.0) | 15.0 (11.3,19.6) | -10.0 | 0.026 | -4.4  | 0.158 |
|               |     |                  |  | Social independence       | 26.5 (21.1,32.7) | 22.1 (16.0,29.8) | 13.2 (7.8,21.6)  | -15.3 | 0.027 | -7.2  | 0.116 |
| Côte D'Ivoire | CIV | 23.4 (19.5,27.8) |  | Decision making           | 26.2 (20.5,32.8) | 23.6 (17.4,31.4) | 16.7 (11.7,23.1) | -12.4 | 0.047 | -6.3  | 0.149 |
|               |     |                  |  | Attitude towards violence | 27.9 (21.0,36.1) | 27.7 (20.2,36.6) | 18.5 (13.9,24.2) | -15.9 | 0.021 | -7.6  | 0.130 |

|                    |     |                  |                           |                  |                  |                  |       |       |       |       |
|--------------------|-----|------------------|---------------------------|------------------|------------------|------------------|-------|-------|-------|-------|
| Dominican Republic | DOM | 9.8 (6.6,14.3)   | Social independence       | 10.7 (5.6,19.7)  | 14.6 (9.0,22.8)  | 6.3 (3.1,12.3)   | -11.0 | 0.033 | -17.1 | 0.067 |
|                    |     |                  | Decision making           | 0.0              | 10.3 (4.5,22.1)  | 10.0 (6.4,15.4)  | 2.9   | 0.746 | 4.5   | 0.694 |
|                    |     |                  | Attitude towards violence | 29.5 (3.3,83.6)  | 35.9 (9.4,75.2)  | 9.0 (5.8,13.8)   | -34.5 | 0.088 | -5.2  | 0.706 |
| Egypt              | EGY | 0.6 (0.3,1.1)    | Social independence       | 1.5 (0.6,3.8)    | 0.6 (0.2,1.5)    | 0.4 (0.1,1.0)    | -1.2  | 0.160 | -14.7 | 0.408 |
|                    |     |                  | Decision making           | 1.4 (0.3,5.4)    | 0.2 (0.1,0.8)    | 0.7 (0.3,1.4)    | 0.0   | 0.966 | 15.0  | 0.472 |
|                    |     |                  | Attitude towards violence | 1.2 (0.4,3.6)    | 0.6 (0.2,2.0)    | 0.4 (0.2,1.0)    | -1.0  | 0.245 | -8.5  | 0.680 |
| Ethiopia           | ETH | 26.1 (22.5,30.1) | Social independence       | 30.4 (25.8,35.5) | 24.8 (18.8,32.0) | 10.3 (5.7,18.1)  | -22.9 | 0.000 | -11.3 | 0.003 |
|                    |     |                  | Decision making           | 33.6 (24.1,44.6) | 22.2 (16.5,29.2) | 26.0 (21.5,31.0) | -2.8  | 0.699 | -0.9  | 0.819 |
|                    |     |                  | Attitude towards violence | 27.8 (22.4,33.9) | 22.9 (16.3,31.3) | 25.9 (20.5,32.2) | -4.0  | 0.560 | -1.6  | 0.713 |
| Gabon              | GAB | 9.6 (6.7,13.5)   | Social independence       | 13.6 (8.0,22.3)  | 8.7 (5.3,14.1)   | 8.0 (3.8,16.1)   | -7.2  | 0.243 | -14.4 | 0.185 |
|                    |     |                  | Decision making           | 11.1 (4.6,24.4)  | 11.0 (6.9,17.0)  | 7.1 (4.1,11.9)   | -6.4  | 0.274 | -13.1 | 0.112 |
|                    |     |                  | Attitude towards violence | 15.5 (8.6,26.2)  | 4.5 (2.6,7.7)    | 10.4 (6.2,17.0)  | -4.7  | 0.503 | -10.7 | 0.287 |
| Gambia             | GMB | 1.7 (1.0,2.9)    | Social independence       | 1.0 (0.4,2.5)    | 2.6 (1.2,5.5)    | 1.9 (0.7,5.0)    | 1.9   | 0.265 | 21.4  | 0.141 |
|                    |     |                  | Decision making           | 3.9 (1.4,10.6)   | 1.5 (0.7,3.2)    | 0.8 (0.4,1.9)    | -3.8  | 0.124 | -22.8 | 0.154 |
|                    |     |                  | Attitude towards violence | 1.4 (0.7,2.6)    | 2.6 (1.1,6.1)    | 1.3 (0.3,5.0)    | -0.2  | 0.896 | 4.2   | 0.769 |
| Ghana              | GHA | 3.1 (2.0,4.9)    | Social independence       | 4.5 (2.5,8.0)    | 3.1 (1.4,7.0)    | 1.8 (0.8,3.9)    | -4.0  | 0.068 | -18.9 | 0.058 |
|                    |     |                  | Decision making           | 5.2 (2.1,11.9)   | 6.2 (3.4,11.2)   | 1.1 (0.5,2.3)    | -8.6  | 0.001 | -35.4 | 0.000 |
|                    |     |                  | Attitude towards violence | 3.4 (0.8,13.3)   | 6.8 (3.2,13.8)   | 2.1 (1.2,3.8)    | -4.7  | 0.136 | -16.3 | 0.230 |
| Guatemala          | GTM | 2.6 (1.9,3.5)    | Social independence       | 5.5 (3.7,8.2)    | 1.4 (0.8,2.4)    | 1.7 (0.7,3.8)    | -5.0  | 0.012 | -33.3 | 0.001 |
|                    |     |                  | Decision making           | 3.9 (1.7,8.6)    | 3.3 (1.9,5.6)    | 2.0 (1.3,3.1)    | -2.5  | 0.111 | -14.9 | 0.132 |
|                    |     |                  | Attitude towards violence | 1.0 (0.1,6.8)    | 3.5 (1.7,7.1)    | 2.5 (1.8,3.6)    | -0.3  | 0.860 | -1.6  | 0.846 |
| Guinea             | GIN | 38.1 (34.3,42.1) | Social independence       | 40.0 (35.2,45.0) | 35.9 (29.9,42.3) | 35.0 (27.7,43.1) | -8.3  | 0.144 | -1.0  | 0.685 |
|                    |     |                  | Decision making           | 45.3 (40.2,50.5) | 37.3 (30.9,44.2) | 29.9 (24.7,35.6) | -22.8 | 0.000 | -7.1  | 0.004 |

|            |     |                  |  |                           |                  |                  |                  |       |       |       |       |
|------------|-----|------------------|--|---------------------------|------------------|------------------|------------------|-------|-------|-------|-------|
|            |     |                  |  | Attitude towards violence | 42.1 (37.2,47.3) | 30.4 (23.0,39.1) | 33.8 (27.5,40.8) | -16.5 | 0.015 | -3.3  | 0.216 |
|            |     |                  |  | Social independence       | 23.6 (17.4,31.1) | 19.5 (14.6,25.6) | 11.0 (7.1,16.6)  | -18.1 | 0.002 | -12.8 | 0.014 |
| Haiti      | HTI | 17.3 (13.9,21.3) |  | Decision making           | 20.2 (11.6,32.9) | 16.9 (12.0,23.4) | 17.1 (13.2,21.9) | -1.7  | 0.778 | 2.3   | 0.708 |
|            |     |                  |  | Attitude towards violence | 20.2 (11.0,34.2) | 10.6 (5.8,18.5)  | 18.1 (14.4,22.5) | 8.8   | 0.236 | 10.6  | 0.133 |
|            |     |                  |  | Social independence       | 0.7 (0.3,2.0)    | 0.2 (0.0,1.6)    | 1.7 (0.8,3.8)    | 1.5   | 0.197 | 25.7  | 0.140 |
| Honduras   | HND | 0.9 (0.5,1.6)    |  | Decision making           | 2.5 (0.5,10.7)   | 0.0              | 1.2 (0.6,2.4)    | 1.6   | 0.164 | 23.3  | 0.117 |
|            |     |                  |  | Attitude towards violence | 0.0              | 0.9 (0.2,4.1)    | 0.9 (0.5,1.8)    | 0.6   | 0.619 | 6.5   | 0.645 |
|            |     |                  |  | Social independence       | 14.2 (12.2,16.4) | 9.6 (8.4,11.0)   | 6.3 (5.1,7.7)    | -10.4 | 0.000 | -15.8 | 0.000 |
| India      | IND | 9.1 (8.2,10.0)   |  | Decision making           | 12.6 (10.4,15.2) | 8.7 (7.2,10.5)   | 8.0 (7.0,9.1)    | -6.0  | 0.001 | -7.4  | 0.013 |
|            |     |                  |  | Attitude towards violence | 11.6 (9.8,13.6)  | 8.1 (6.6,9.8)    | 8.3 (7.2,9.6)    | -4.2  | 0.012 | -5.6  | 0.046 |
|            |     |                  |  | Social independence       | 21.1 (15.0,28.7) | 12.7 (10.2,15.8) | 8.6 (7.2,10.1)   | -12.0 | 0.000 | -21.0 | 0.000 |
| Indonesia  | IDN | 10.8 (9.5,12.4)  |  | Decision making           | 16.2 (9.8,25.6)  | 12.1 (9.6,15.0)  | 9.9 (8.5,11.6)   | -5.2  | 0.039 | -14.7 | 0.000 |
|            |     |                  |  | Attitude towards violence | 14.2 (9.7,20.2)  | 10.2 (8.0,12.8)  | 10.7 (9.2,12.5)  | -1.3  | 0.596 | -10.2 | 0.003 |
|            |     |                  |  | Social independence       | 3.1 (1.8,5.2)    | 1.4 (0.8,2.6)    | 1.2 (0.5,2.7)    | -2.4  | 0.057 | -13.8 | 0.230 |
| Kenya      | KEN | 1.8 (1.2,2.6)    |  | Decision making           | 2.2 (0.9,5.1)    | 1.3 (0.7,2.4)    | 2.0 (1.1,3.5)    | 0.5   | 0.707 | 14.9  | 0.227 |
|            |     |                  |  | Attitude towards violence | 2.8 (1.5,5.3)    | 1.3 (0.6,2.8)    | 1.5 (0.9,2.7)    | -1.3  | 0.285 | -3.2  | 0.789 |
|            |     |                  |  | Social independence       | 0.0              | 3.8 (1.4,10.4)   | 1.0 (0.3,3.2)    | -4.9  | 0.154 | -15.8 | 0.545 |
| Kyrgyzstan | KGZ | 1.7 (0.8,3.6)    |  | Decision making           | 0.0              | 4.0 (1.1,13.7)   | 1.2 (0.5,3.2)    | -2.7  | 0.405 | -9.4  | 0.676 |
|            |     |                  |  | Attitude towards violence | 1.4 (0.5,3.8)    | 1.6 (0.5,5.2)    | 1.8 (0.5,5.9)    | 0.6   | 0.785 | 17.7  | 0.397 |
|            |     |                  |  | Social independence       | 3.3 (0.5,19.0)   | 1.7 (0.6,4.4)    | 1.6 (0.6,4.7)    | -1.1  | 0.694 | -27.1 | 0.115 |
| Lesotho    | LSO | 1.8 (0.9,3.5)    |  | Decision making           | 2.6 (0.4,17.3)   | 1.9 (0.6,5.6)    | 1.7 (0.7,4.2)    | -0.7  | 0.778 | -26.6 | 0.009 |
|            |     |                  |  | Attitude towards violence | 0.0              | 0.4 (0.1,3.1)    | 2.5 (1.3,5.0)    | 5.6   | 0.059 | 3.7   | 0.775 |
| Liberia    | LBR | 9.9 (7.8,12.5)   |  | Social independence       | 13.4 (9.8,18.1)  | 7.4 (4.7,11.4)   | 3.6 (1.8,6.9)    | -15.6 | 0.002 | -27.6 | 0.000 |

|         |     |                  |  |                           |                  |                  |                  |       |       |       |       |
|---------|-----|------------------|--|---------------------------|------------------|------------------|------------------|-------|-------|-------|-------|
|         |     |                  |  | Decision making           | 10.2 (4.4,21.8)  | 10.1 (6.2,16.0)  | 9.7 (7.0,13.4)   | -0.7  | 0.896 | -7.7  | 0.289 |
|         |     |                  |  | Attitude towards violence | 11.4 (7.0,17.8)  | 16.2 (11.0,23.2) | 7.4 (5.0,10.9)   | -8.7  | 0.066 | -16.3 | 0.038 |
|         |     |                  |  | Social independence       | 3.6 (2.3,5.6)    | 1.8 (1.2,2.7)    | 0.8 (0.2,3.1)    | -4.1  | 0.011 | -26.3 | 0.002 |
| Malawi  | MWI | 2.3 (1.7,3.1)    |  | Decision making           | 2.8 (1.4,5.4)    | 2.6 (1.5,4.3)    | 1.9 (1.2,3.0)    | -1.3  | 0.310 | -8.6  | 0.369 |
|         |     |                  |  | Attitude towards violence | 2.0 (0.7,5.9)    | 4.5 (1.9,10.4)   | 2.0 (1.5,2.8)    | -2.8  | 0.203 | -17.6 | 0.063 |
|         |     |                  |  | Social independence       | 20.5 (16.7,25.0) | 16.6 (13.0,20.9) | 13.1 (8.6,19.3)  | -11.1 | 0.018 | -9.7  | 0.014 |
| Mali    | MLI | 18.4 (15.5,21.8) |  | Decision making           | 19.2 (16.0,22.8) | 18.6 (13.7,24.8) | 11.7 (6.8,19.3)  | -5.9  | 0.272 | -5.6  | 0.170 |
|         |     |                  |  | Attitude towards violence | 18.3 (14.5,22.8) | 17.2 (13.2,22.1) | 20.4 (15.3,26.7) | 1.6   | 0.744 | -1.8  | 0.697 |
|         |     |                  |  | Social independence       | 20.6 (12.9,31.2) | 18.1 (12.4,25.5) | 7.7 (4.9,11.8)   | -20.2 | 0.000 | -17.9 | 0.004 |
| Myanmar | MMR | 13.0 (9.9,16.9)  |  | Decision making           | 16.4 (8.2,30.0)  | 13.0 (8.1,20.2)  | 12.7 (9.0,17.7)  | -2.4  | 0.705 | 5.7   | 0.492 |
|         |     |                  |  | Attitude towards violence | 14.2 (8.0,24.1)  | 13.0 (8.9,18.6)  | 12.7 (8.7,18.0)  | -1.6  | 0.771 | 2.3   | 0.714 |
|         |     |                  |  | Social independence       | 3.2 (0.8,11.5)   | 2.9 (0.5,14.2)   | 7.6 (4.3,13.1)   | 10.0  | 0.166 | 8.0   | 0.445 |
| Namibia | NAM | 5.9 (3.6,9.6)    |  | Decision making           | 6.5 (0.9,34.5)   | 7.2 (2.9,16.6)   | 5.5 (2.9,10.3)   | -2.6  | 0.692 | -15.3 | 0.246 |
|         |     |                  |  | Attitude towards violence | 1.9 (0.6,6.4)    | 7.1 (2.0,22.1)   | 6.5 (3.6,11.3)   | 4.8   | 0.462 | 6.7   | 0.632 |
|         |     |                  |  | Social independence       | 4.3 (2.5,7.4)    | 3.7 (1.9,7.0)    | 1.7 (0.6,5.3)    | -3.5  | 0.160 | -22.8 | 0.031 |
| Nepal   | NPL | 3.4 (2.3,5.0)    |  | Decision making           | 2.3 (1.1,4.5)    | 4.0 (2.0,8.0)    | 4.5 (2.3,8.9)    | 3.6   | 0.155 | 7.9   | 0.507 |
|         |     |                  |  | Attitude towards violence | 4.9 (1.6,14.1)   | 5.2 (2.3,11.3)   | 2.7 (1.6,4.5)    | -4.1  | 0.164 | -25.0 | 0.020 |
|         |     |                  |  | Social independence       | 14.6 (12.2,17.4) | 13.1 (9.4,18.0)  | 6.7 (2.1,19.3)   | -6.7  | 0.122 | -6.6  | 0.142 |
| Niger   | NER | 14.0 (11.7,16.7) |  | Decision making           | 16.5 (13.5,19.9) | 11.3 (8.2,15.2)  | 10.6 (6.6,16.5)  | -10.4 | 0.006 | -11.7 | 0.004 |
|         |     |                  |  | Attitude towards violence | 14.2 (10.9,18.2) | 12.1 (8.4,17.2)  | 14.6 (11.4,18.6) | 0.4   | 0.927 | -1.0  | 0.854 |
|         |     |                  |  | Social independence       | 53.2 (50.4,56.1) | 27.9 (25.0,31.0) | 10.8 (9.1,12.8)  | -63.4 | 0.000 | -27.5 | 0.000 |
| Nigeria | NGA | 34.9 (32.9,36.9) |  | Decision making           | 49.0 (46.1,52.0) | 34.3 (31.2,37.6) | 17.0 (14.7,19.6) | -46.6 | 0.000 | -22.2 | 0.000 |
|         |     |                  |  | Attitude towards violence | 53.7 (49.4,58.0) | 46.0 (40.5,51.5) | 27.1 (25.1,29.3) | -45.3 | 0.000 | -21.8 | 0.000 |

|                  |     |                  |  |                           |                  |                  |                  |       |       |       |       |
|------------------|-----|------------------|--|---------------------------|------------------|------------------|------------------|-------|-------|-------|-------|
|                  |     |                  |  | Social independence       | 22.4 (17.6,28.1) | 15.8 (11.5,21.4) | 4.8 (3.1,7.2)    | -26.6 | 0.000 | -21.0 | 0.000 |
| Pakistan         | PAK | 13.7 (11.3,16.6) |  | Decision making           | 17.6 (14.1,21.8) | 13.0 (8.9,18.7)  | 8.3 (5.5,12.5)   | -16.1 | 0.001 | -6.6  | 0.143 |
|                  |     |                  |  | Attitude towards violence | 22.7 (17.7,28.7) | 12.8 (8.2,19.5)  | 9.0 (6.7,12.0)   | -20.7 | 0.000 | -13.5 | 0.013 |
| Papua New Guinea | PNG | 34.7 (30.9,38.8) |  | Social independence       | 43.5 (36.0,51.3) | 36.5 (30.6,42.8) | 28.8 (23.3,35.0) | -20.3 | 0.003 | -7.2  | 0.022 |
|                  |     |                  |  | Decision making           | 46.3 (34.1,58.9) | 29.9 (23.9,36.8) | 35.1 (30.5,40.0) | -2.2  | 0.763 | 1.2   | 0.683 |
|                  |     |                  |  | Attitude towards violence | 39.6 (34.3,45.3) | 27.9 (21.6,35.2) | 32.2 (26.1,39.1) | -14.6 | 0.023 | -4.4  | 0.121 |
| Peru             | PER | 4.9 (3.8,6.3)    |  | Social independence       | 7.3 (4.6,11.5)   | 4.0 (2.7,5.7)    | 5.0 (3.5,7.1)    | -0.1  | 0.977 | 7.8   | 0.336 |
|                  |     |                  |  | Decision making           | 10.8 (5.9,18.8)  | 7.3 (4.2,12.6)   | 3.8 (2.9,4.9)    | -7.1  | 0.024 | -12.5 | 0.060 |
|                  |     |                  |  | Attitude towards violence | 4.3 (0.9,18.4)   | 12.6 (3.9,33.7)  | 4.8 (3.7,6.3)    | -7.7  | 0.271 | 14.5  | 0.032 |
| Philippines      | PHL | 13.5 (11.6,15.7) |  | Social independence       | 28.5 (20.5,38.1) | 15.5 (11.8,20.0) | 11.0 (8.7,13.7)  | -14.8 | 0.000 | -16.1 | 0.001 |
|                  |     |                  |  | Decision making           | 19.6 (10.9,32.7) | 8.5 (5.3,13.2)   | 14.2 (12.0,16.8) | 8.9   | 0.105 | 1.3   | 0.797 |
|                  |     |                  |  | Attitude towards violence | 16.4 (7.0,33.8)  | 15.3 (9.4,23.9)  | 13.3 (11.2,15.7) | -4.1  | 0.523 | -5.0  | 0.355 |
| Rwanda           | RWA | 0.5 (0.2,1.2)    |  | Social independence       | 0.8 (0.1,5.3)    | 0.7 (0.2,2.6)    | 0.1 (0.0,1.0)    | -1.1  | 0.165 | -45.0 | 0.064 |
|                  |     |                  |  | Decision making           | 1.6 (0.2,10.4)   | 0.7 (0.2,2.3)    | 0.2 (0.1,0.9)    | -1.2  | 0.119 | -44.0 | 0.070 |
|                  |     |                  |  | Attitude towards violence | 0.5 (0.1,3.4)    | 1.1 (0.4,3.3)    | 0.2 (0.1,0.9)    | -0.9  | 0.298 | -41.2 | 0.008 |
| Senegal          | SEN | 4.3 (2.9,6.4)    |  | Social independence       | 5.0 (2.9,8.7)    | 3.0 (1.6,5.4)    | 5.0 (2.1,11.2)   | -0.9  | 0.814 | 4.0   | 0.715 |
|                  |     |                  |  | Decision making           | 5.0 (3.3,7.7)    | 2.5 (0.8,7.4)    | 0.5 (0.1,3.6)    | -12.3 | 0.106 | -5.1  | 0.648 |
|                  |     |                  |  | Attitude towards violence | 5.3 (2.9,9.4)    | 1.1 (0.2,5.0)    | 4.2 (2.3,7.3)    | -1.3  | 0.694 | 0.8   | 0.941 |
| Sierra Leone     | SLE | 5.2 (3.9,6.8)    |  | Social independence       | 5.7 (4.0,8.2)    | 5.1 (3.2,7.9)    | 3.8 (2.1,6.8)    | -2.4  | 0.274 | -2.6  | 0.686 |
|                  |     |                  |  | Decision making           | 3.7 (2.4,5.8)    | 7.0 (4.6,10.7)   | 5.8 (3.4,9.5)    | 3.6   | 0.186 | 14.2  | 0.071 |
|                  |     |                  |  | Attitude towards violence | 4.7 (3.2,6.9)    | 3.9 (2.0,7.5)    | 6.0 (3.9,9.1)    | 2.2   | 0.413 | 9.9   | 0.276 |
| South Africa     | ZAF | 9.3 (5.5,15.4)   |  | Social independence       | 8.0 (1.1,41.0)   | 15.5 (6.3,33.4)  | 7.3 (3.5,14.5)   | -11.7 | 0.266 | -26.7 | 0.020 |
|                  |     |                  |  | Decision making           | 31.2 (8.2,69.7)  | 2.8 (0.6,13.0)   | 10.1 (5.8,17.0)  | 10.7  | 0.364 | -4.5  | 0.757 |

|             |     |                  |                           |                  |                  |                  |       |       |       |       |
|-------------|-----|------------------|---------------------------|------------------|------------------|------------------|-------|-------|-------|-------|
|             |     |                  | Attitude towards violence | 13.9 (1.8,59.2)  | 6.4 (0.8,35.1)   | 9.4 (5.4,15.9)   | 2.9   | 0.835 | -11.5 | 0.469 |
|             |     |                  | Social independence       | 6.4 (4.3,9.3)    | 2.3 (1.2,4.3)    | 1.3 (0.6,2.8)    | -7.6  | 0.000 | -27.9 | 0.000 |
| Tanzania    | TZA | 3.2 (2.3,4.4)    | Decision making           | 8.4 (5.3,13.0)   | 2.0 (1.1,3.4)    | 2.0 (1.0,3.8)    | -7.6  | 0.006 | -25.1 | 0.015 |
|             |     |                  | Attitude towards violence | 4.4 (2.8,6.8)    | 1.8 (0.9,3.6)    | 2.6 (1.6,4.1)    | -3.0  | 0.122 | -7.1  | 0.419 |
|             |     |                  | Social independence       | 23.0 (17.1,30.2) | 26.6 (21.9,31.9) | 17.6 (14.6,21.1) | -12.0 | 0.006 | -5.9  | 0.074 |
| Timor-Leste | TLS | 21.6 (18.8,24.7) | Decision making           | 42.6 (29.3,57.2) | 29.2 (20.7,39.4) | 20.1 (17.3,23.4) | -20.7 | 0.005 | 0.1   | 0.988 |
|             |     |                  | Attitude towards violence | 22.8 (19.3,26.8) | 15.8 (11.3,21.6) | 22.9 (17.0,30.1) | -4.5  | 0.445 | 0.6   | 0.872 |
|             |     |                  | Social independence       | 10.5 (7.4,14.7)  | 4.9 (3.1,7.6)    | 4.1 (1.7,9.7)    | -10.0 | 0.006 | -18.4 | 0.056 |
| Togo        | TGO | 6.7 (4.8,9.4)    | Decision making           | 9.1 (5.7,14.2)   | 6.0 (4.0,8.9)    | 5.3 (2.8,9.9)    | -5.3  | 0.129 | -8.7  | 0.358 |
|             |     |                  | Attitude towards violence | 5.9 (2.5,13.2)   | 7.0 (3.8,12.4)   | 6.9 (5.0,9.5)    | 1.2   | 0.737 | 4.5   | 0.522 |
|             |     |                  | Social independence       | 5.6 (3.9,7.9)    | 5.1 (3.4,7.5)    | 4.1 (2.6,6.5)    | -2.0  | 0.305 | -13.9 | 0.027 |
| Uganda      | UGA | 5.0 (3.9,6.4)    | Decision making           | 4.0 (2.2,7.0)    | 5.1 (3.6,7.2)    | 5.2 (3.6,7.5)    | 1.2   | 0.582 | -3.6  | 0.552 |
|             |     |                  | Attitude towards violence | 4.3 (2.7,6.7)    | 5.2 (3.3,8.2)    | 5.2 (3.9,7.1)    | 1.2   | 0.523 | -2.8  | 0.641 |
|             |     |                  | Social independence       | 2.7 (1.5,4.8)    | 1.6 (0.8,3.3)    | 0.9 (0.2,4.3)    | -2.5  | 0.115 | -19.0 | 0.083 |
| Zambia      | ZMB | 1.8 (1.2,2.8)    | Decision making           | 2.1 (0.8,5.1)    | 1.8 (0.8,4.0)    | 1.8 (1.0,3.2)    | -0.1  | 0.924 | 0.8   | 0.941 |
|             |     |                  | Attitude towards violence | 3.1 (1.7,5.5)    | 1.4 (0.4,4.3)    | 1.2 (0.6,2.5)    | -2.8  | 0.071 | -18.8 | 0.156 |
|             |     |                  | Social independence       | 20.1 (13.3,29.2) | 9.5 (6.4,13.8)   | 7.1 (4.5,10.9)   | -15.2 | 0.006 | -23.9 | 0.001 |
| Zimbabwe    | ZWE | 10.6 (8.1,13.7)  | Decision making           | 31.7 (16.0,53.1) | 13.4 (8.7,20.0)  | 8.5 (6.2,11.6)   | -14.1 | 0.008 | -21.1 | 0.001 |
|             |     |                  | Attitude towards violence | 12.5 (6.0,24.2)  | 12.1 (8.0,18.1)  | 9.4 (6.8,12.9)   | -5.3  | 0.349 | -9.3  | 0.246 |

---

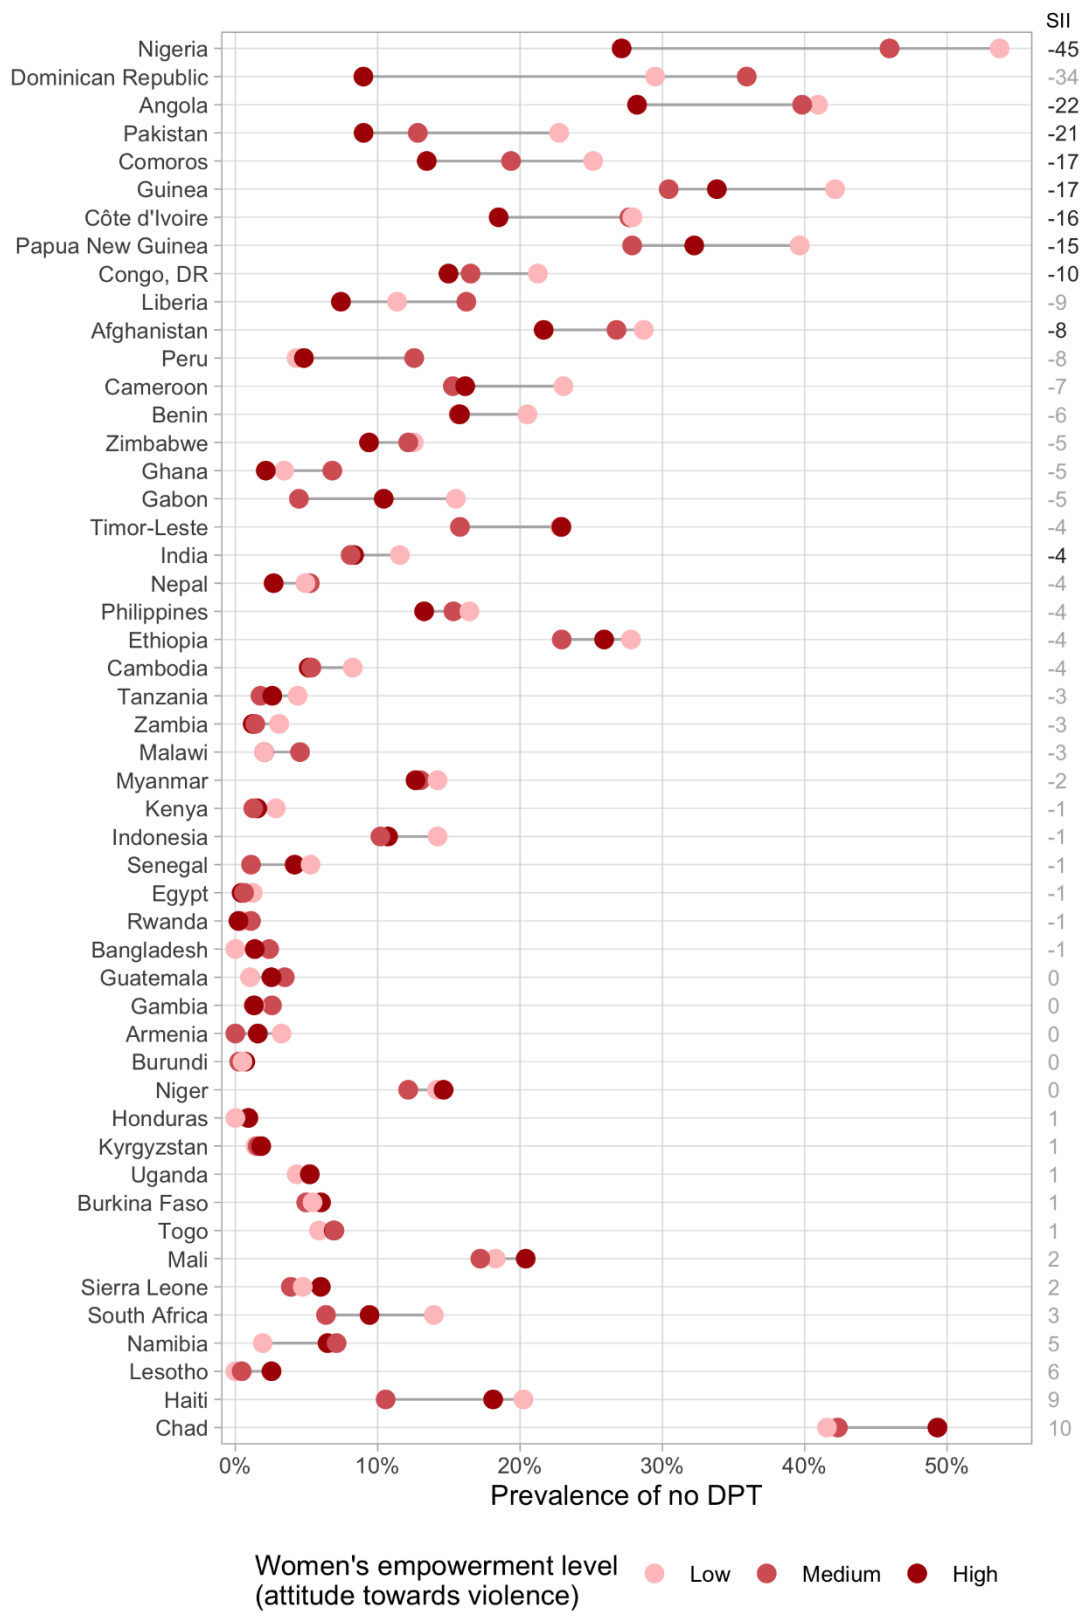

Figure S1 – No-DPT prevalence according to levels of SWPER’s attitude towards violence domain by country. Light grey font indicates non-significant SII values.  
 Note: countries are ordered by the slope index of inequality (SII).  
 Estimates with N<25: Armenia(low), Dominican Republic (low and medium), Peru(low), Philippines(low), South Africa (low and medium).



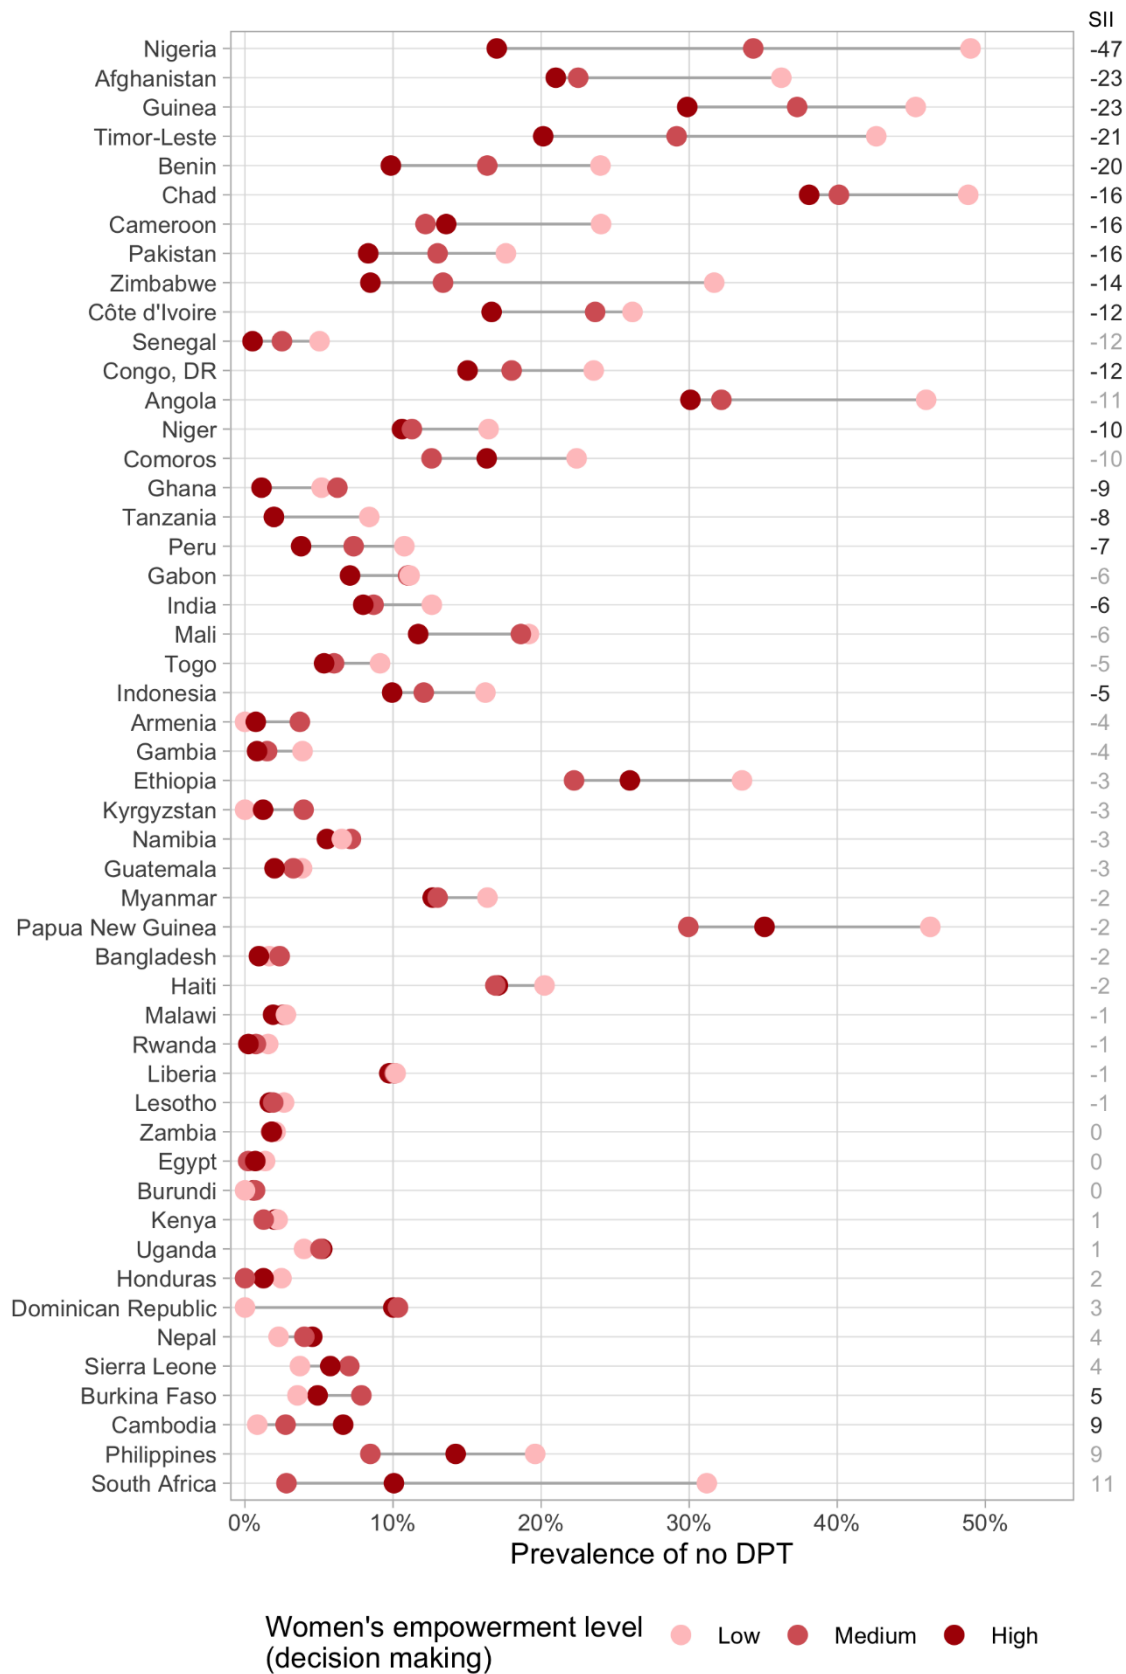

Figure S2 – No-DPT prevalence according to levels of SWPER’s decision-making domain by country. Light grey font indicates non-significant SII values.

Note: countries are ordered by the slope index of inequality (SII). Estimates with N<25: Armenia(low), Cambodia(low), Dominican Republic (low), Lesotho(low), South Africa (low).

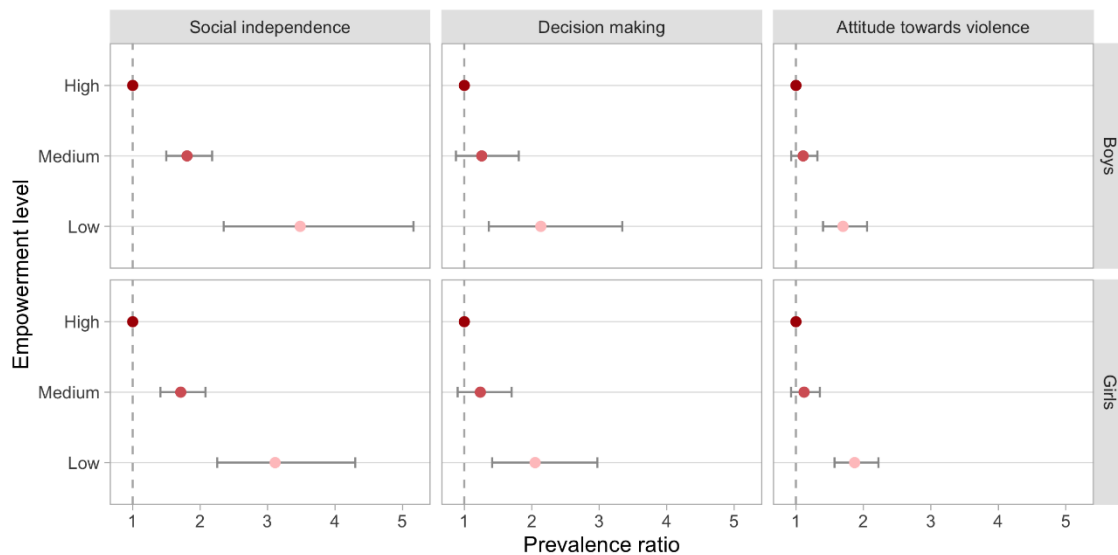

Figure S3 – Pooled prevalence ratio for no-DPT according to level of empowerment for each SWPER domain and by child’s sex.

| <b>Social independence domain</b>                                |
|------------------------------------------------------------------|
| Frequency of reading newspaper or magazine                       |
| Woman education in completed years of schooling                  |
| Age of woman at first birth                                      |
| Age at first cohabitation                                        |
| Age difference: woman’s minus husband’s age                      |
| Education difference: woman’s minus husband’s years of schooling |
| <b>Decision-making domain</b>                                    |
| Who usually decides on respondent’s health care                  |
| Who usually decides on large household purchases                 |
| Who usually decides on visits to family or relatives             |
| <b>Attitude towards violence domain</b>                          |
| Beating justified if wife goes out without telling husband       |
| Beating justified if wife neglects the children                  |
| Beating justified if wife argues with husband                    |
| Beating justified if wife refuses to have sex with husband       |
| Beating justified if wife burns the food                         |

Supp Table 2 : Items used in each domain of SWPER Global. Source: Ewerling, 2020.

Figure S4. Correlations between no-DPT prevalence and the proportion of women with a high level of empowerment for each SWPER domain, at country level excluding countries in the lowest no-DPT tercile.

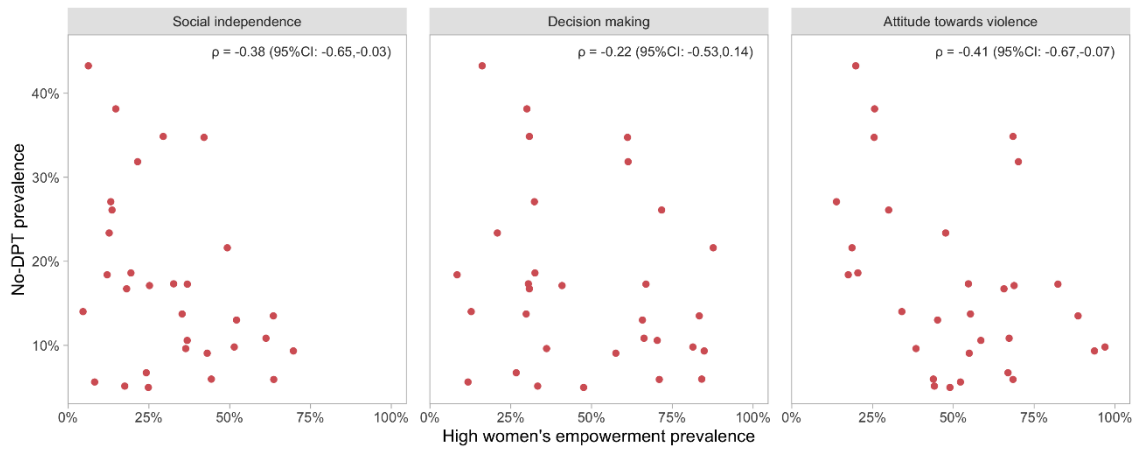

TS3: Pooled prevalence ratio for no-DPT according to level of empowerment for each SWPER domain adjusted for wealth quintiles.

|               | <b>PR (95%CI)</b>          | <b>PR (95%CI)</b>      | <b>PR (95%CI)</b>                |
|---------------|----------------------------|------------------------|----------------------------------|
|               | <b>Social independence</b> | <b>Decision making</b> | <b>Attitude towards violence</b> |
| <b>High</b>   | 1.00                       | 1.00                   | 1.00                             |
| <b>Medium</b> | 1.4 (1.2; 1.7)             | 1.2 (0.9; 1.6)         | 1.0 (0.9; 1.2)                   |
| <b>Low</b>    | 2.5 (1.8; 3.4)             | 1.9 (1.3; 2.7)         | 1.5 (1.3; 1.8)                   |
